# Supplementary material
Source: PubMed Central journal article supplement (PMC6048402)
Supplement: ajcr0008-1040-f7.pdf [file ajcr0008-1040-f7.pdf]

## SBP1 and CXCR4 in HCC

**Supplemental Table 1.** Demographic characteristics of the patients (n=200)

| Features                                 | Values/counts           |
|------------------------------------------|-------------------------|
| Age, median (range), y                   | 53 (27-84)              |
| Gender, male/female                      | 166 (83.0%)/34 (17.0%)  |
| HBsAg, positive/negative                 | 178 (89.0%)/22 (11.0%)  |
| TB, $\leq 17$ / $> 17$ $\mu\text{mol/L}$ | 145 (72.5%)/55 (27.5%)  |
| ALT, $\leq 40$ / $> 40$ U/L              | 100 (50.0%)/100 (50.0%) |
| AFP, $> 20$ / $\leq 20$ ng/ml            | 130 (65.0%)/70 (35.0%)  |
| Liver cirrhosis, yes/no                  | 167 (83.5%)/33 (16.5%)  |
| Tumor size, $\leq 5.0$ / $> 5.0$ cm      | 105 (52.5%)/95 (47.5%)  |
| Tumor number, multiple/solitary          | 40 (20.0%)/160 (80.0%)  |
| Encapsulation, complete/none             | 105 (52.5%)/95 (47.5%)  |
| Edmondson-Steiner, I-II/III-IV           | 150 (75.0%)/50 (25.0%)  |
| Microvascular invasion, yes/no           | 66 (33.0%)/134 (67.0%)  |
| SBP1, positive/negative                  | 68 (34.0%)/132 (66.0%)  |
| CXCR4, positive/negative                 | 115 (57.5%)/85 (42.5%)  |

Abbreviations: HBsAg, hepatitis B surface antigen; TB, total bilirubin; ALT, alanine transaminase; AFP,  $\alpha$ -fetoprotein; SBP1, selenium-binding protein 1; CXCR4, C-X-C motif chemokine receptor 4.

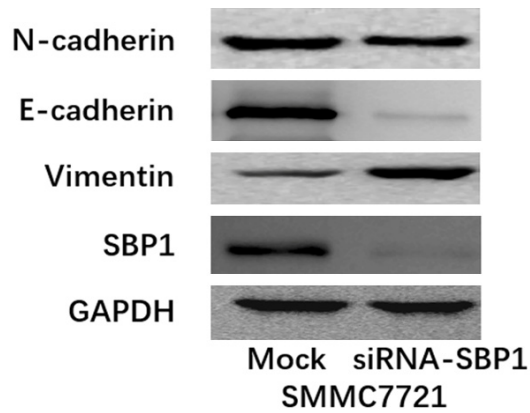

**Supplemental Figure 1.** Effects of SBP1 induction on E-cadherin, vimentin, and N-cadherin protein expression in SMMC7721 cell.
